# Supplementary material for: Isolation of stable non cyclic 1,2-disulfoxides. Revisiting the thermolysis of S-aryl sulfinimines
Source: Royal Society of Chemistry journal article supplement (doi:10.1039/c4cc05751a), 2014-01-01

## 1,2-Disulfoxides as products in the thermolysis of sulfinimines

*José A. Souto, William Lewis,<sup>§</sup> Robert A. Stockman\**

### *Supplementary Information*

|     |                                                                                                                                                                             |      |
|-----|-----------------------------------------------------------------------------------------------------------------------------------------------------------------------------|------|
| 1.  | General remarks.....                                                                                                                                                        | S-2  |
| 2.  | Screening of solvents.....                                                                                                                                                  | S-3  |
| 3.  | Procedures for the synthesis of vicinal disulfoxides.....                                                                                                                   | S-3  |
| 3.1 | General procedure.....                                                                                                                                                      | S-3  |
| 3.2 | Experiment using radical inhibitors.....                                                                                                                                    | S-3  |
| 4.  | Synthesis and characterisation of vicinal disulfoxides <b>4a</b> and <b>4b</b> , disulfides <b>3a</b> and <b>3b</b> , thiosulfinate <b>5</b> and 2-naphthalene nitrile..... | S-4  |
| 5.  | X-Ray analytical data for compounds <b>4a</b> , <b>4b</b> , and <b>3a</b> .....                                                                                             | S-7  |
| 6.  | Spectral characterisation of vicinal disulfoxides <b>4a</b> and <b>4b</b> , disulfides <b>3a</b> and <b>3b</b> , thiosulfinate <b>5</b> and 2-naphthalene nitrile .....     | S-13 |

## 1. General remarks

Unless otherwise stated, reagents were purchased from commercial sources and used without further purification. The sulfinimines were synthesised following previously described procedures and their spectroscopy data compared to values reported in literature. Compound **5** was synthesised following a reported procedure and its spectroscopy data matches those previously described. All reactions were carried out in flame-dried glassware under Ar atmosphere. THF was distilled from Na/benzophenone immediately prior to use. DCM was dried over 4Å molecular sieves prior to use. Column chromatography was carried on silica gel Fluka 60 using petroleum ether (40-60°C)/ethyl acetate as eluent, whilst monitoring by UV (254 nm) and thin layer chromatography (PMA stain). All NMR spectra were obtained in CDCl<sub>3</sub> at room temperature using Bruker® DPX300, Bruker® AV400 spectrometers for which chemical shifts are expressed in ppm relative to the solvent and coupling constants are expressed in Hz. Infrared spectroscopic data were recorded using a Bruker® Tensor27 FTIR spectrometer. Mass spectral data (and HRMS) were obtained using a Bruker® MicroTOF spectrometer. Melting points were measured on a Gallenkamp® apparatus.

## 2. Screening of solvents

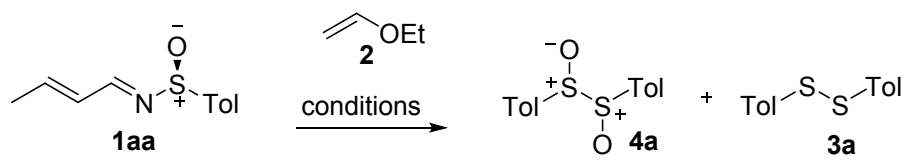

| Entry | Conditions                                                                    | <b>4a</b> [%] <sup>a</sup> | <b>3a</b> [%] <sup>a</sup> |
|-------|-------------------------------------------------------------------------------|----------------------------|----------------------------|
| 1     | <b>1aa</b> , <b>2</b> (0.07M in benzene), 100°C, 20h                          | 57                         | 40                         |
| 2     | <b>1aa</b> (0.07M in benzene), 100°C, 20h                                     | 60                         | 40                         |
| 3     | <b>1aa</b> (0.07M in dichloroethane), 100°C, 20h                              | 50                         | 36                         |
| 4     | <b>1aa</b> (0.07M in dioxane), 100°C, 20h                                     | 43                         | 33                         |
| 5     | <b>1aa</b> (0.07M in toluene), 100°C, 20h                                     | 25                         | 35                         |
| 6     | <b>1aa</b> (0.07M in heptane), 100°C, 20h                                     | 20                         | 46                         |
| 7     | <b>1aa</b> (0.14M in benzene), 100°C, 20h                                     | 41                         | 52                         |
| 8     | <b>1aa</b> (0.03M in benzene), 100°C, 20h                                     | 52                         | 33                         |
| 9     | <b>1aa</b> (0.07M in benzene), 100°C, 20h <sup>b</sup>                        | 40                         | 52                         |
| 10    | <b>1aa</b> (0.07M in benzene), 100°C, O <sub>2</sub> (1atm), 20h <sup>b</sup> | 53                         | 46                         |

<sup>a</sup> GC yields. <sup>b</sup> Reaction mixture was previously degassed.

## 3. Procedures for the synthesis of vicinal disulfoxides.

**2.1 General procedure for the synthesis of vicinal disulfoxide 4:** A solution of the corresponding sulfinimine **1** (0.48 mmol) in benzene (7 mL) was stirred at 100 °C (unless otherwise stated). After 15 h (unless otherwise stated) the solvent was removed under reduced pressure. The crude mixture was purified by column chromatography (silicagel, petrol ether/EtOAc 10%) to afford the desired vicinal disulfoxide and the corresponding disulfide.

**2.2 Experiment with radical inhibitors:** A solution of (*E*)-*N*-benzyliden-4-methylbenzenesulfinamide **1aa** (0.01 g, 0.041 mmol) in benzene (0.7 mL) was stirred at 100 °C in the presence of butylated hydroxytoluene (BHT) (0.018 g, 0.082 mmol). After 15 h the solvent was removed under reduced pressure. The crude mixture was purified by column chromatography (silicagel, petrol ether/EtOAc 10%) to afford 4 mg of the vicinal disulfoxide (52%) and the corresponding disulfide.

### 3. Characterisation of vicinal disulfoxides 4a and 4b, disulfides 3a and 3b, thiosulfinate 5 and 2-naphthalene nitrile..

#### 4-Methyl-phenyl-disulfoxide 4a.

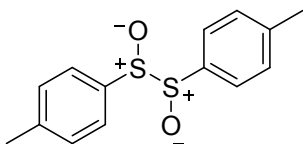

Synthesized according to the general procedure described above. Isolated as a white solid.

**m.p.** = 72-75 °C.

**<sup>1</sup>H-NMR (400 MHz, CDCl<sub>3</sub>):**  $\delta$  = 7.49 (d,  $J$  = 8.4 Hz, 2H), 7.29-7.16 (m, 4H), 7.17 (d,  $J$  = 8.0 Hz, 2H), 2.45 (s, 3H), 2.41 (s, 3H).

**<sup>13</sup>C-NMR (100 MHz, CDCl<sub>3</sub>):**  $\delta$  = 144.6 (s), 142.0 (s), 140.5 (s), 136.5 (s), 130.2 (d), 129.4 (d), 127.6 (d), 124.6 (s), 21.7 (q), 21.5 (q).

**IR  $\nu$ (cm<sup>-1</sup>):** 3012, 2926, 1596, 1491, 1453, 1401, 1328, 1305, 1144, 1079, 1018.

**HRMS (ESI-MS):** calcd. for C<sub>14</sub>H<sub>14</sub>NaO<sub>2</sub>S<sub>2</sub>: 301.0327, found: 301.0323.

#### 4-Methyl-phenyl-disulfide 3a.

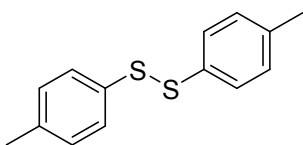

Synthesized according to the general procedure described above. Isolated as a white solid.

**m.p.** = 43-45 °C.

**<sup>1</sup>H-NMR (400 MHz, CDCl<sub>3</sub>):**  $\delta$  = 7.38 (d,  $J$  = 8.2 Hz, 4H), 7.10 (d,  $J$  = 8.0 Hz, 4H), 2.32 (s, 6H).

**<sup>13</sup>C-NMR (100 MHz, CDCl<sub>3</sub>):**  $\delta$  = 137.4 (s), 133.9 (s), 129.8 (s), 128.5 (s), 21.0 (q).

**IR  $\nu$ (cm<sup>-1</sup>):** 3011, 2925, 2867, 1490, 1452, 1398, 1262, 1079, 1016

#### 2,4,6-Trimethyl-phenyl-disulfoxide 4b.

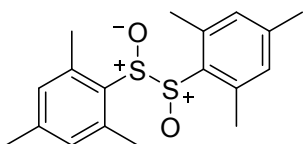

Synthesized according to the general procedure described above. Isolated as a white solid.

**m.p.** = 79-81 °C

**<sup>1</sup>H-NMR (500 MHz, CDCl<sub>3</sub>):** δ = 7.01 (s, 2H), 6.91 (s, 2H), 2.66 (bs, 6H), 2.56 (s, 6H), 2.33 (s, 3H), 2.32 (s, 3H).

**<sup>13</sup>C-NMR (100 MHz, CDCl<sub>3</sub>):** δ = 144.6 (s), 141.7 (s), 140.7 (s), 137.7 (s), 131.9 (d), 130.6 (bs), 129.5 (d), 23.5 (q), 21.5 (q), 21.4 (q), 19.1 (q).

**IR v(cm<sup>-1</sup>):** 3012, 2925, 1596, 1490, 1453, 1402, 1328, 1304, 1144, 1079, 1017.

**HRMS (ESI-MS):** calcd. for C<sub>18</sub>H<sub>22</sub>NaO<sub>2</sub>S<sub>2</sub>: 357.0959, found: 357.0953.

### 1,2-dimesityldisulfane **3b**

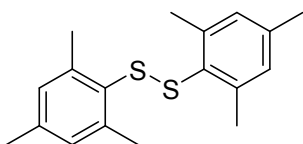

Synthesized according to the general procedure described above. Isolated as a white solid.

**m.p.** = 50-52 °C.

**<sup>1</sup>H-NMR (400 MHz, CDCl<sub>3</sub>):** δ = 6.84 (s, 4H), 2.25 (s, 6H), 2.21 (s, 12H).

**<sup>13</sup>C-NMR (100 MHz, CDCl<sub>3</sub>):** δ = 143.2 (s), 139.2 (s), 128.9 (d), 131.6 (s), 21.4 (q), 21.1(q).

**IR v(cm<sup>-1</sup>):** 3013, 2927, 2860, 1493, 1398, 1260, 1080, 1011.

### (*p*-tolyl) 4-methylbenzenesulfinothioate **5**

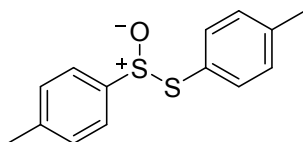

To a cold solution (-40°C) of disulfide **3a** (0.06 g, 0.2 mmol) in DCM (2 mL) was added mCPBA (0.035 g, 0.2 mmol) and the mixture was stirred at -40°C for 1h. After that time an aqueous saturated solution of NaHCO<sub>3</sub> was added and the aqueous phase extracted with DCM (3x). Combined organic layers were dried (Na<sub>2</sub>SO<sub>4</sub>), filtered and solvent was removed under reduced pressure. The crude mixture was purified by column chromatography (silicagel, petrol ether/EtOAc 10%) to afford 30 mg (57%) of a white

solid identified (*p*-tolyl) 4-methylbenzenesulfinothioate **5**. Due to previously described instability the compound was immediately submitted to the disproportionation reaction described below.

**<sup>1</sup>H-NMR (400 MHz, CDCl<sub>3</sub>):** δ = 7.57 (d, *J* = 8.3 Hz, 2H), 7.44 (d, *J* = 8.1 Hz, 2H), 7.30 (d, *J* = 8.0 Hz, 2H), 7.19 (d, *J* = 7.9 Hz, 2H), 2.42 (s, 3H), 2.38 (s, 3H).

**HRMS (ESI-MS):** calcd. for C<sub>14</sub>H<sub>15</sub>OS<sub>2</sub>: 263.0564, found: 263.0548.

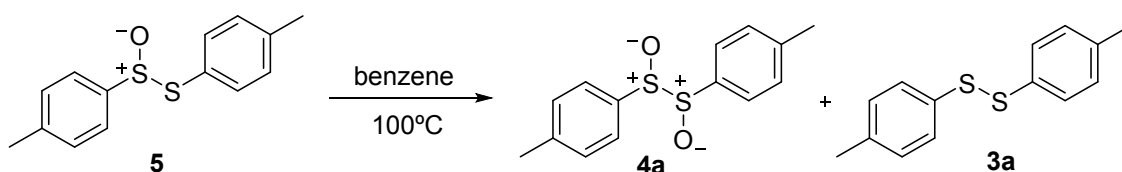

A solution of the thiol-sulfinate **5** (0.01g, 0.038 mmol) in benzene (0.7 mL) was stirred at 100°C for 15 h. Then solvent was removed and the crude reaction analysed by <sup>1</sup>H-NMR to observe a clean transformation to the depicted disulfoxide **4a** and disulfide **3a** in a ratio **4a:3a** 1:1.2. Disulfoxide **4a** was isolated in 43% yield after purification by column chromatography.

### 2-naphthalene nitrile.

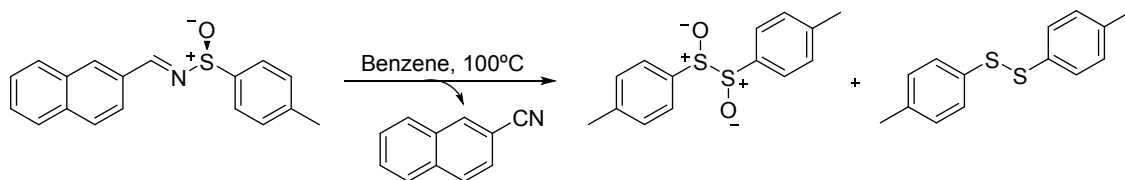

A solution of the sulfinimine **1ae** (0.14g, 0.48 mmol) in benzene (7 mL) was stirred at 100°C. After 20 h the solvent was removed under reduced pressure. The crude mixture was purified by column chromatography (silicagel, petrol ether/EtOAc 5%) to afford 30 mg of a white solid identified as 2-naphthalene nitrile (40% yield) together with the desired vicinal disulfoxide and disulfide.

**m.p.** = 64-67 °C.

**<sup>1</sup>H-NMR (400 MHz, CDCl<sub>3</sub>):** δ = 8.26 (s, 1H), 7.95-7.91 (m, 3H), 7.68-7.62 (m, 3H).

**HRMS (ESI-MS):** calcd. for C<sub>11</sub>H<sub>7</sub>NNa: 153.0578, found: 153.0582.

## 4. X-Ray analytical data of vicinal disulfoxides 4a and 4b and disulfide 3a.

### 4.1 General procedure for the crystallisation of compounds 4a, 3a and 4b.

The compound was dissolved in a mixture of chloroform and dichloromethane and it was recrystallised by slow evaporation at 0°C.

### 4.2 X-Ray analytical data for compound 4a.

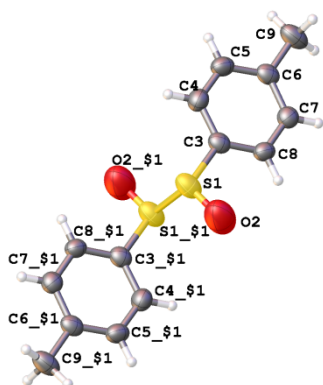

**Table 1** Crystal data and structure refinement for 4a

|                                       |                                                               |
|---------------------------------------|---------------------------------------------------------------|
| Identification code                   | 4a                                                            |
| Empirical formula                     | C <sub>14</sub> H <sub>14</sub> O <sub>2</sub> S <sub>2</sub> |
| Formula weight                        | 278.37                                                        |
| Temperature/K                         | 120(2)                                                        |
| Crystal system                        | monoclinic                                                    |
| Space group                           | P2 <sub>1</sub> /c                                            |
| a/Å                                   | 5.7235(12)                                                    |
| b/Å                                   | 7.5497(11)                                                    |
| c/Å                                   | 15.671(2)                                                     |
| α/°                                   | 90                                                            |
| β/°                                   | 97.432(15)                                                    |
| γ/°                                   | 90                                                            |
| Volume/Å <sup>3</sup>                 | 671.45(19)                                                    |
| Z                                     | 2                                                             |
| ρ <sub>calc</sub> /mg/mm <sup>3</sup> | 1.377                                                         |
| m/mm <sup>-1</sup>                    | 3.519                                                         |
| F(000)                                | 292.0                                                         |
| Crystal size/mm <sup>3</sup>          | 0.612 × 0.2273 × 0.046                                        |
| 2θ range for data collection          | 13.038 to 149.622°                                            |
| Index ranges                          | -7 ≤ h ≤ 6, -9 ≤ k ≤ 9, -19 ≤ l ≤ 19                          |
| Reflections collected                 | 2646                                                          |
| Independent reflections               | 1306[R(int) = 0.0257]                                         |
| Data/restraints/parameters            | 1306/0/95                                                     |
| Goodness-of-fit on F <sup>2</sup>     | 1.087                                                         |
| Final R indexes [I ≥ 2σ (I)]          | R <sub>1</sub> = 0.0517, wR <sub>2</sub> = 0.1339             |
| Final R indexes [all data]            | R <sub>1</sub> = 0.0617, wR <sub>2</sub> = 0.1443             |

Largest diff. peak/hole / e Å<sup>-3</sup> 0.37/-0.36

**Table 2 Bond Lengths for 4a.**

| Atom | Atom            | Length/Å    | Atom | Atom | Length/Å  |
|------|-----------------|-------------|------|------|-----------|
| S1   | S1 <sup>1</sup> | 2.1096 (15) | C4   | C5   | 1.381 (4) |
| S1   | O2              | 1.379 (6)   | C5   | C6   | 1.395 (4) |
| S1   | O2A             | 1.261 (7)   | C6   | C7   | 1.386 (4) |
| S1   | C3              | 1.778 (3)   | C6   | C9   | 1.505 (4) |
| C3   | C4              | 1.391 (4)   | C7   | C8   | 1.382 (4) |
| C3   | C8              | 1.388 (4)   |      |      |           |

<sup>1</sup>1-X,1-Y,1-Z

**Table 3 Bond Angles for 4a.**

| Atom | Atom | Atom            | Angle/°   | Atom | Atom | Atom | Angle/°   |
|------|------|-----------------|-----------|------|------|------|-----------|
| O2   | S1   | S1 <sup>1</sup> | 111.9 (3) | C5   | C4   | C3   | 119.1 (2) |
| O2   | S1   | C3              | 108.9 (3) | C4   | C5   | C6   | 121.4 (2) |
| O2A  | S1   | S1 <sup>1</sup> | 113.0 (4) | C5   | C6   | C9   | 120.3 (3) |
| O2A  | S1   | C3              | 109.2 (4) | C7   | C6   | C5   | 118.3 (2) |
| C3   | S1   | S1 <sup>1</sup> | 96.50 (9) | C7   | C6   | C9   | 121.3 (3) |
| C4   | C3   | S1              | 119.2 (2) | C8   | C7   | C6   | 121.3 (2) |
| C8   | C3   | S1              | 120.4 (2) | C7   | C8   | C3   | 119.5 (2) |
| C8   | C3   | C4              | 120.4 (2) |      |      |      |           |

<sup>1</sup>1-X,1-Y,1-Z

**Table 4 Torsion Angles for 4a.**

| A               | B  | C  | D  | Angle/°      | A  | B  | C  | D  | Angle/°    |
|-----------------|----|----|----|--------------|----|----|----|----|------------|
| S1 <sup>1</sup> | S1 | C3 | C4 | 85.1 (2)     | C3 | C4 | C5 | C6 | -0.3 (4)   |
| S1 <sup>1</sup> | S1 | C3 | C8 | -95.8 (2)    | C4 | C3 | C8 | C7 | 1.2 (4)    |
| S1              | C3 | C4 | C5 | 178.3 (2)    | C4 | C5 | C6 | C7 | 0.9 (4)    |
| S1              | C3 | C8 | C7 | -177.79 (19) | C4 | C5 | C6 | C9 | -178.4 (3) |
| O2              | S1 | C3 | C4 | -159.0 (4)   | C5 | C6 | C7 | C8 | -0.4 (4)   |
| O2              | S1 | C3 | C8 | 20.0 (4)     | C6 | C7 | C8 | C3 | -0.6 (4)   |
| O2A             | S1 | C3 | C4 | -32.0 (5)    | C8 | C3 | C4 | C5 | -0.8 (4)   |
| O2A             | S1 | C3 | C8 | 147.0 (5)    | C9 | C6 | C7 | C8 | 178.9 (3)  |

<sup>1</sup>1-X,1-Y,1-Z



### 3.2.2 X-Ray analytical data for compound 4b.

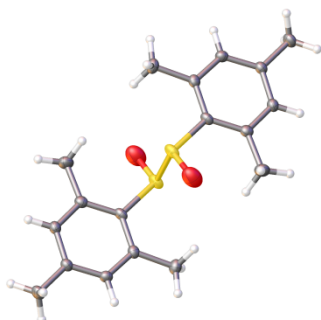

**Table 1 Crystal data and structure refinement for 4b**

|                                             |                                                               |
|---------------------------------------------|---------------------------------------------------------------|
| Identification code                         | 4b                                                            |
| Empirical formula                           | C <sub>18</sub> H <sub>22</sub> O <sub>2</sub> S <sub>2</sub> |
| Formula weight                              | 334.47                                                        |
| Temperature/K                               | 120(2)                                                        |
| Crystal system                              | triclinic                                                     |
| Space group                                 | P-1                                                           |
| a/Å                                         | 7.5624(11)                                                    |
| b/Å                                         | 8.0233(11)                                                    |
| c/Å                                         | 8.1209(9)                                                     |
| α/°                                         | 84.776(10)                                                    |
| β/°                                         | 69.822(12)                                                    |
| γ/°                                         | 61.946(15)                                                    |
| Volume/Å <sup>3</sup>                       | 406.64(11)                                                    |
| Z                                           | 1                                                             |
| ρ <sub>calc</sub> /mg/mm <sup>3</sup>       | 1.366                                                         |
| m/mm <sup>-1</sup>                          | 2.995                                                         |
| F(000)                                      | 178.0                                                         |
| Crystal size/mm <sup>3</sup>                | 0.4824 × 0.1558 × 0.1068                                      |
| 2θ range for data collection                | 11.652 to 155.654°                                            |
| Index ranges                                | -9 ≤ h ≤ 9, -10 ≤ k ≤ 10, -10 ≤ l ≤ 10                        |
| Reflections collected                       | 7093                                                          |
| Independent reflections                     | 1709[R(int) = 0.0342]                                         |
| Data/restraints/parameters                  | 1709/0/113                                                    |
| Goodness-of-fit on F <sup>2</sup>           | 1.148                                                         |
| Final R indexes [I >= 2σ(I)]                | R <sub>1</sub> = 0.0568, wR <sub>2</sub> = 0.1733             |
| Final R indexes [all data]                  | R <sub>1</sub> = 0.0584, wR <sub>2</sub> = 0.1748             |
| Largest diff. peak/hole / e Å <sup>-3</sup> | 0.69/-0.45                                                    |

**Table 2 Bond Lengths for 4b.**

| Atom | Atom            | Length/Å    | Atom | Atom | Length/Å  |
|------|-----------------|-------------|------|------|-----------|
| S1   | S1 <sup>1</sup> | 2.1282 (12) | C4   | C9   | 1.510 (3) |
| S1   | O2              | 1.468 (5)   | C5   | C6   | 1.393 (4) |
| S1   | O2A             | 1.392 (6)   | C6   | C7   | 1.396 (3) |
| S1   | C3              | 1.784 (2)   | C6   | C10  | 1.505 (3) |
| C3   | C4              | 1.408 (3)   | C7   | C8   | 1.393 (3) |
| C3   | C8              | 1.405 (4)   | C8   | C11  | 1.508 (3) |
| C4   | C5              | 1.393 (3)   |      |      |           |

<sup>1</sup>1-X,-Y,1-Z

**Table 3 Bond Angles for 4b.**

| Atom | Atom | Atom            | Angle/°     | Atom | Atom | Atom | Angle/°   |
|------|------|-----------------|-------------|------|------|------|-----------|
| O2   | S1   | S1 <sup>1</sup> | 112.7 (2)   | C5   | C4   | C9   | 118.9 (2) |
| O2   | S1   | C3              | 109.8 (2)   | C6   | C5   | C4   | 122.0 (2) |
| O2A  | S1   | S1 <sup>1</sup> | 112.4 (3)   | C5   | C6   | C7   | 118.4 (2) |
| O2A  | S1   | C3              | 114.1 (3)   | C5   | C6   | C10  | 121.4 (2) |
| C3   | S1   | S1 <sup>1</sup> | 96.16 (8)   | C7   | C6   | C10  | 120.2 (2) |
| C4   | C3   | S1              | 119.73 (19) | C8   | C7   | C6   | 121.9 (2) |
| C8   | C3   | S1              | 118.87 (19) | C3   | C8   | C11  | 123.1 (2) |
| C8   | C3   | C4              | 121.4 (2)   | C7   | C8   | C3   | 118.2 (2) |
| C3   | C4   | C9              | 123.1 (2)   | C7   | C8   | C11  | 118.7 (2) |
| C5   | C4   | C3              | 118.0 (2)   |      |      |      |           |

<sup>1</sup>1-X,-Y,1-Z

### 3.2.3 X-Ray analytical data for compound 3a.

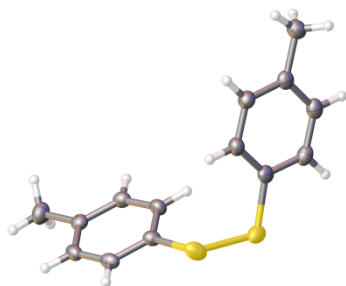

**Table 1 Crystal data and structure refinement for 3a**

|                                             |                                                   |
|---------------------------------------------|---------------------------------------------------|
| Identification code                         | 3a                                                |
| Empirical formula                           | C <sub>14</sub> H <sub>14</sub> S <sub>2</sub>    |
| Formula weight                              | 246.37                                            |
| Temperature/K                               | 120(2)                                            |
| Crystal system                              | monoclinic                                        |
| Space group                                 | P2 <sub>1</sub>                                   |
| a/Å                                         | 7.5701(7)                                         |
| b/Å                                         | 5.7018(6)                                         |
| c/Å                                         | 14.6979(13)                                       |
| α/°                                         | 90                                                |
| β/°                                         | 94.682(8)                                         |
| γ/°                                         | 90                                                |
| Volume/Å <sup>3</sup>                       | 632.29(10)                                        |
| Z                                           | 2                                                 |
| ρ <sub>calc</sub> /mg/mm <sup>3</sup>       | 1.294                                             |
| m/mm <sup>-1</sup>                          | 3.545                                             |
| F(000)                                      | 260.0                                             |
| Crystal size/mm <sup>3</sup>                | 0.5996 × 0.2451 × 0.0366                          |
| 2θ range for data collection                | 6.034 to 153.092°                                 |
| Index ranges                                | -9 ≤ h ≤ 9, -6 ≤ k ≤ 7, -14 ≤ l ≤ 18              |
| Reflections collected                       | 4647                                              |
| Independent reflections                     | 2393[R(int) = 0.0298]                             |
| Data/restraints/parameters                  | 2393/1/147                                        |
| Goodness-of-fit on F <sup>2</sup>           | 1.053                                             |
| Final R indexes [I > 2σ(I)]                 | R <sub>1</sub> = 0.0307, wR <sub>2</sub> = 0.0787 |
| Final R indexes [all data]                  | R <sub>1</sub> = 0.0329, wR <sub>2</sub> = 0.0819 |
| Largest diff. peak/hole / e Å <sup>-3</sup> | 0.25/-0.21                                        |
| Flack parameter                             | 0.132(15)                                         |

**Table 2 Bond Lengths for 3a.**

| Atom | Atom | Length/Å    | Atom | Atom | Length/Å  |
|------|------|-------------|------|------|-----------|
| S1   | S2   | 2.0255 (13) | C7   | C8   | 1.389 (4) |
| S1   | C3   | 1.790 (3)   | C10  | C11  | 1.386 (4) |
| S2   | C10  | 1.786 (3)   | C10  | C15  | 1.385 (5) |
| C3   | C4   | 1.391 (4)   | C11  | C12  | 1.394 (4) |
| C3   | C8   | 1.387 (4)   | C12  | C13  | 1.389 (5) |
| C4   | C5   | 1.383 (4)   | C13  | C14  | 1.394 (5) |
| C5   | C6   | 1.391 (4)   | C13  | C16  | 1.504 (4) |

C6 C7 1.393 (4)  
C6 C9 1.512 (4)

C14 C15 1.384 (5)

**Table 3 Bond Angles for 3a.**

| Atom | Atom | Atom | Angle/°     | Atom | Atom | Atom | Angle/°   |
|------|------|------|-------------|------|------|------|-----------|
| C3   | S1   | S2   | 105.50 (11) | C3   | C8   | C7   | 119.2 (3) |
| C10  | S2   | S1   | 106.55 (12) | C11  | C10  | S2   | 124.3 (2) |
| C4   | C3   | S1   | 115.9 (2)   | C15  | C10  | S2   | 115.6 (2) |
| C8   | C3   | S1   | 123.7 (2)   | C15  | C10  | C11  | 120.1 (3) |
| C8   | C3   | C4   | 120.4 (3)   | C10  | C11  | C12  | 119.5 (3) |
| C5   | C4   | C3   | 119.5 (3)   | C13  | C12  | C11  | 121.3 (3) |
| C4   | C5   | C6   | 121.2 (3)   | C12  | C13  | C14  | 118.0 (3) |
| C5   | C6   | C7   | 118.4 (3)   | C12  | C13  | C16  | 121.7 (3) |
| C5   | C6   | C9   | 121.5 (3)   | C14  | C13  | C16  | 120.3 (3) |
| C7   | C6   | C9   | 120.1 (3)   | C15  | C14  | C13  | 121.3 (3) |
| C8   | C7   | C6   | 121.3 (3)   | C14  | C15  | C10  | 119.9 (3) |

#### 4. Spectral characterisation of vicinal disulfoxides 4a and 4b, disulfides 3a and 3b, thiosulfinate 5 and 2-naphthalene nitrile.

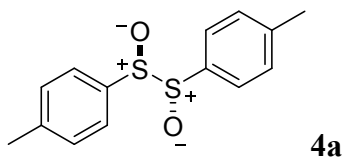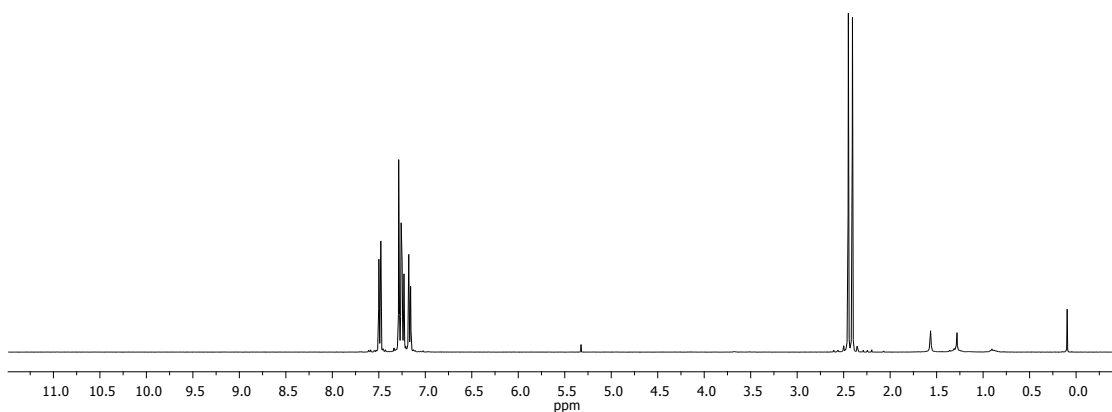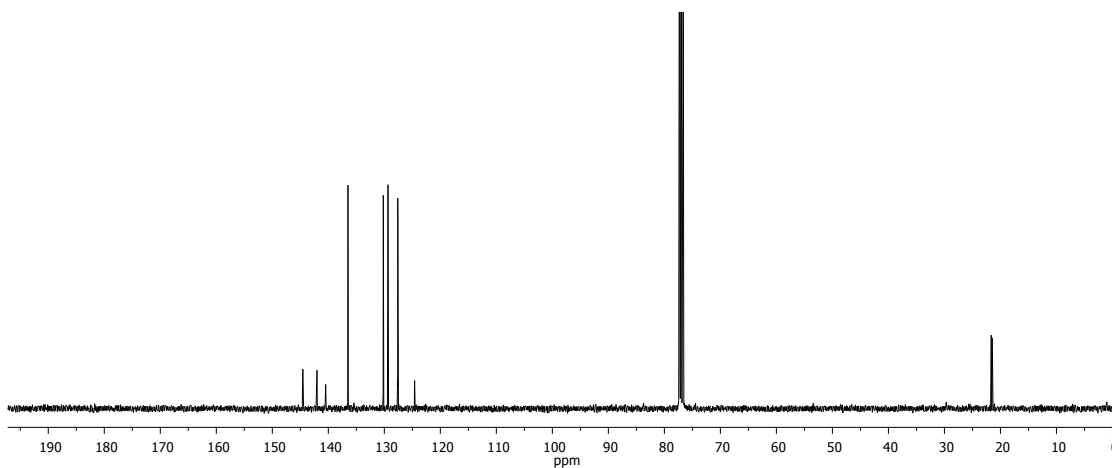

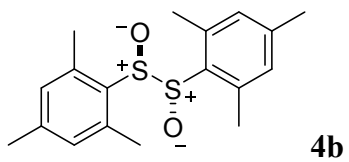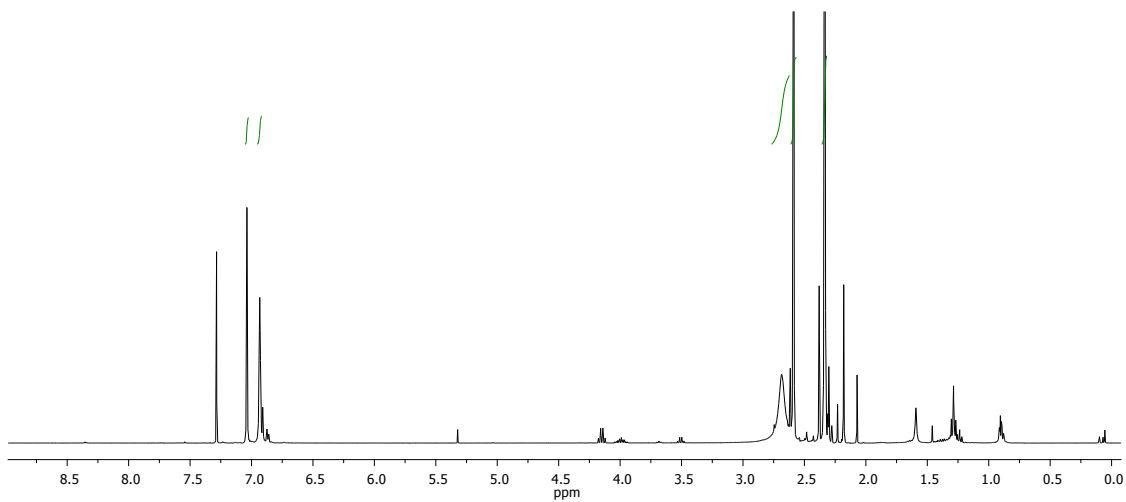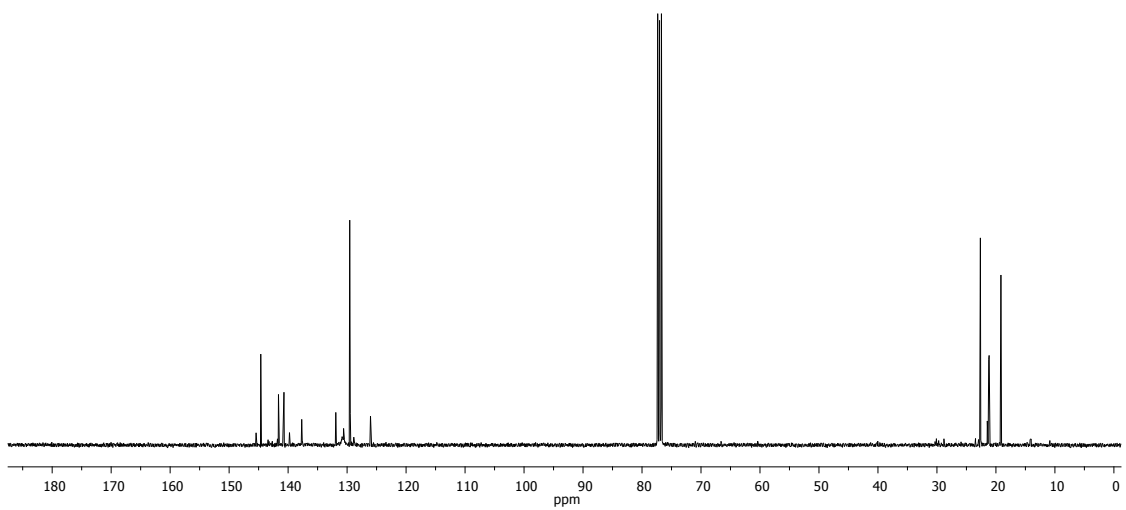

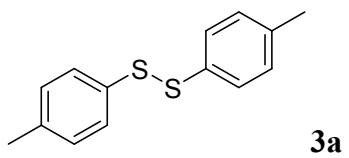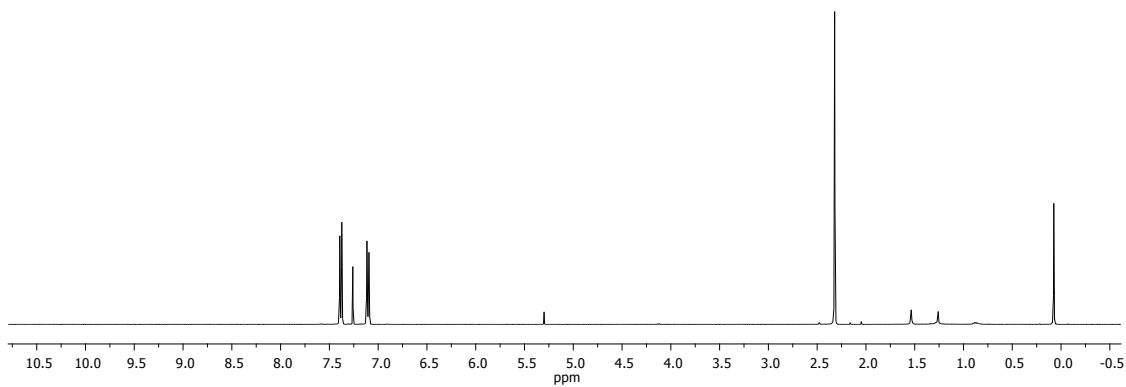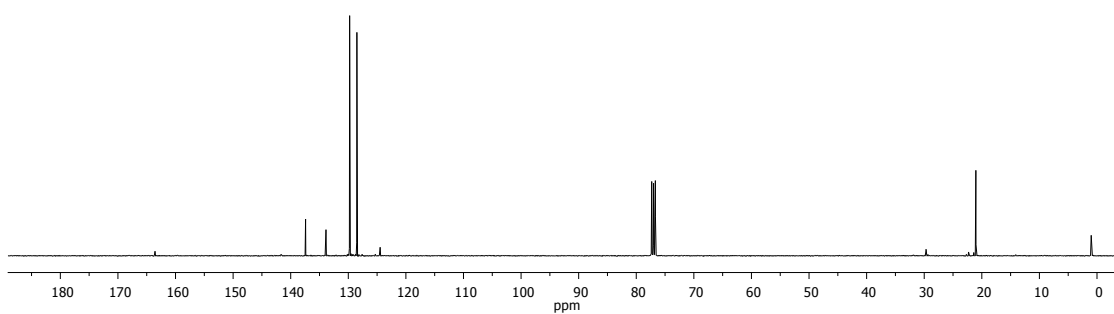

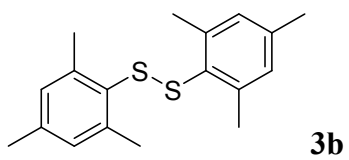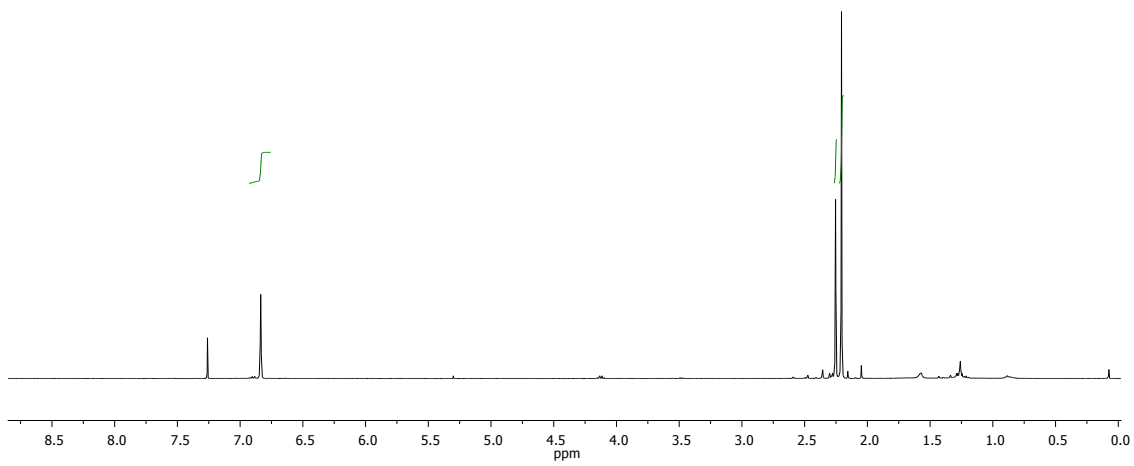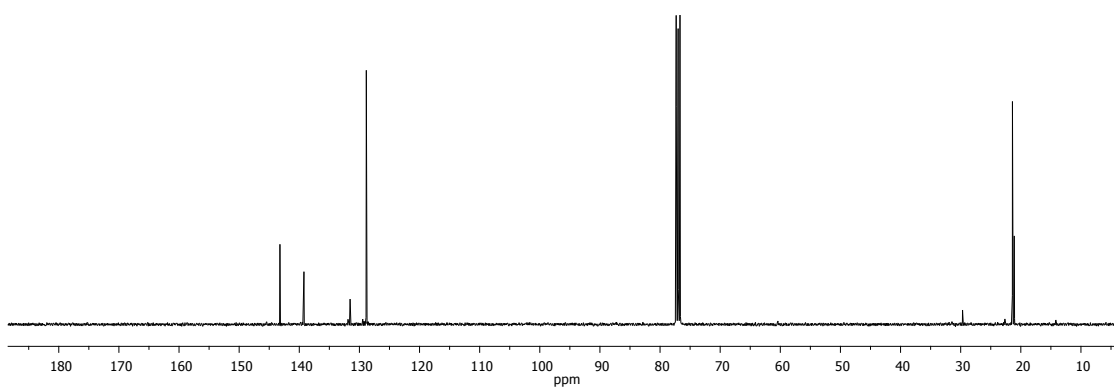



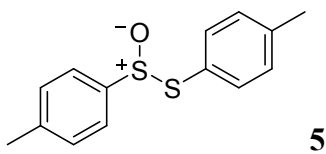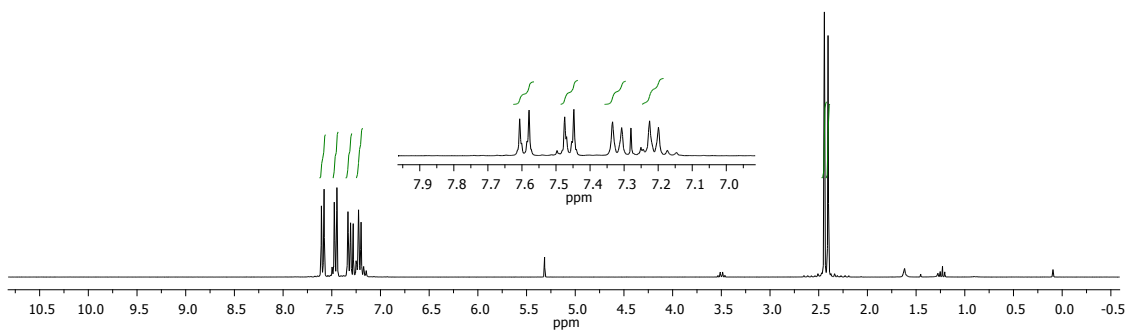

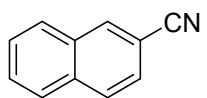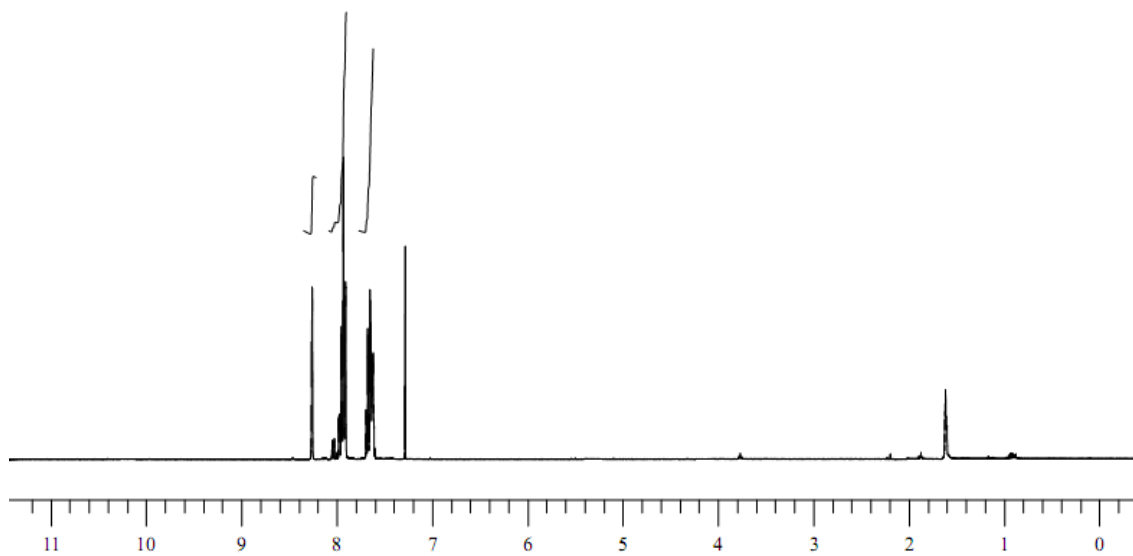

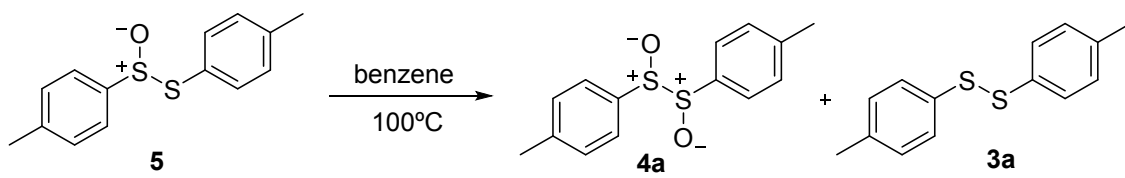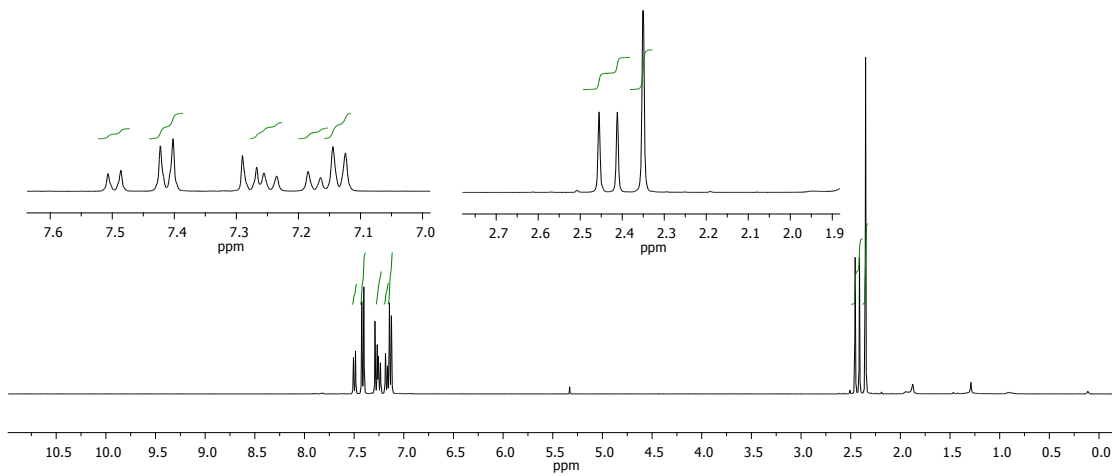

Supplement: c4cc05751a1.pdf [file c4cc05751a1.pdf]
